# Supplementary material for: Ionothermal confined self-organization for hierarchical porous magnesium borate superstructures as highly efficient adsorbents for dye removal
Source: Royal Society of Chemistry journal article supplement (doi:10.1039/c4ta03580a), 2014-01-01
Supplement: c4ta03580a1.pdf [file c4ta03580a1.pdf]

***Electronic supporting information for :***

**Ionothermal confined self-organization for hierarchical porous magnesium borate  
superstructures and their application as adsorbents for efficient dye removal**

*Zhaoqiang Zhang<sup>a</sup>, Wancheng Zhu<sup>a,\*</sup>, Ruguo Wang<sup>a</sup>, Linlin Zhang<sup>a</sup>, Lin Zhu<sup>a</sup>, Qiang Zhang<sup>b,\*</sup>*

<sup>a</sup> Department of Chemical Engineering, Qufu Normal University, Shandong 273165, China.

<sup>b</sup> Beijing Key Laboratory of Green Chemical Reaction Engineering and Technology,  
Department of Chemical Engineering, Tsinghua University, Beijing 100084, China.

---

\* Corresponding author. Tel.: +86-537-4453130; fax: +86-10-62772051.

E-mail: [zhuwancheng@tsinghua.org.cn](mailto:zhuwancheng@tsinghua.org.cn) (W. Zhu); [zhang-qiang@mails.tsinghua.edu.cn](mailto:zhang-qiang@mails.tsinghua.edu.cn) (Q. Zhang).

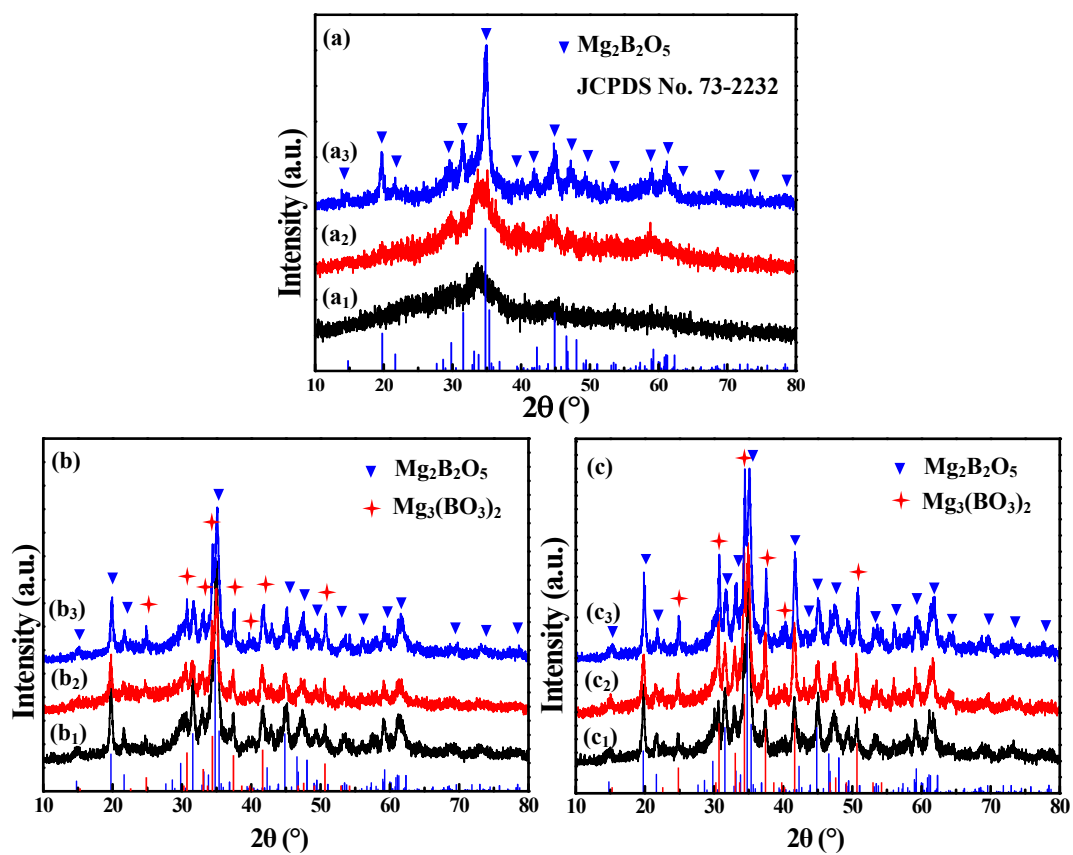

**Fig. S1.**  $\text{MgBO}_2(\text{OH})$  calcined with various heating procedures. Temperature (°C): (a)-600, (b)-650, (c)-700; time (h): (a<sub>1</sub>,b<sub>1</sub>,c<sub>1</sub>)-2.0, (a<sub>2</sub>,b<sub>2</sub>,c<sub>2</sub>)-4.0, (a<sub>3</sub>,b<sub>3</sub>,c<sub>3</sub>)-8.0; heating-rate (°C min<sup>-1</sup>): (a<sub>1</sub>,b<sub>1</sub>,c<sub>1</sub>)-2, (a<sub>2</sub>,b<sub>2</sub>,c<sub>2</sub>)-5, (a<sub>3</sub>,b<sub>3</sub>,c<sub>3</sub>)-10. Vertical lines: red-standard pattern of  $\text{Mg}_3(\text{BO}_3)_2$  (JCPDS No. 33-0858), blue-standard pattern of triclinic  $\text{Mg}_2\text{B}_2\text{O}_5$  (JCPDS No. 73-2232).

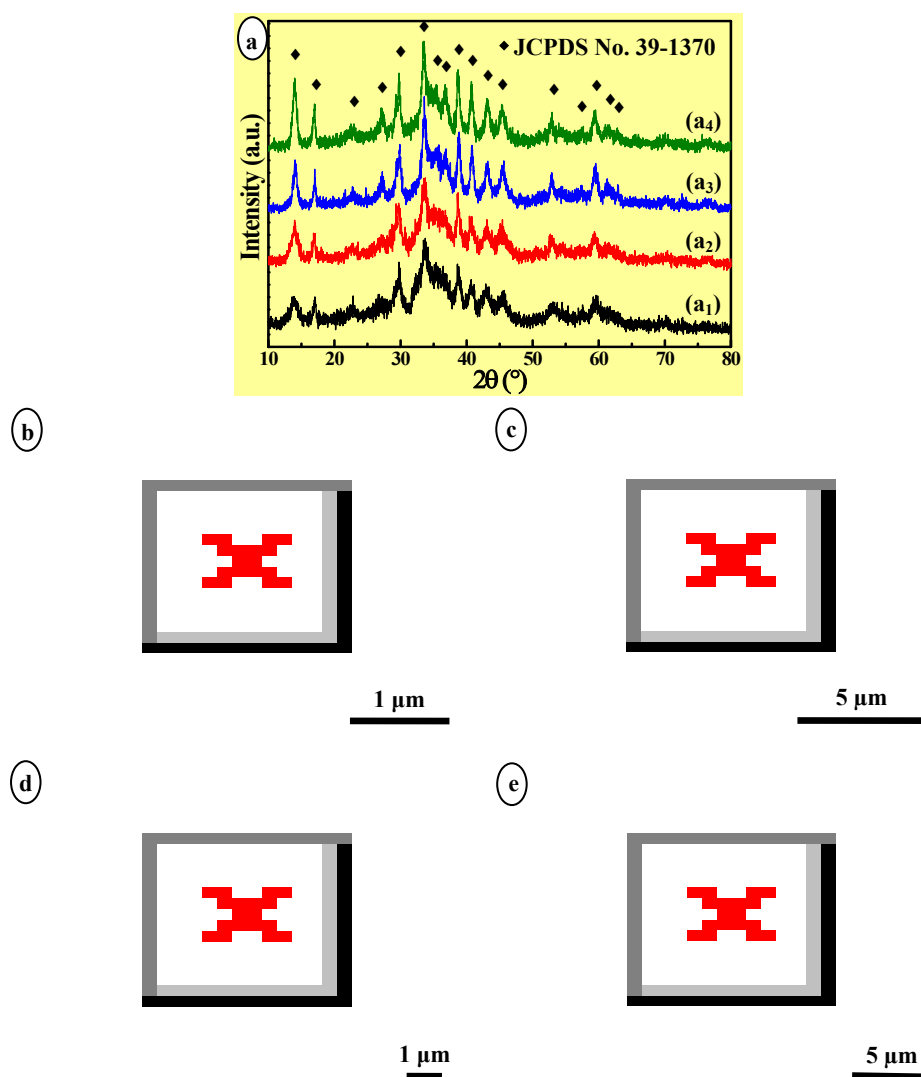

**Fig. S2.** XRD patterns (a) and morphology evolution (b-e) of the ionothermal products formed at various temperatures for 12.0 h. Temperature ( $^\circ\text{C}$ ): (a<sub>1</sub>, b)-120, (a<sub>2</sub>, c)-140, (a<sub>3</sub>, d)-160, (a<sub>4</sub>, e)-180.

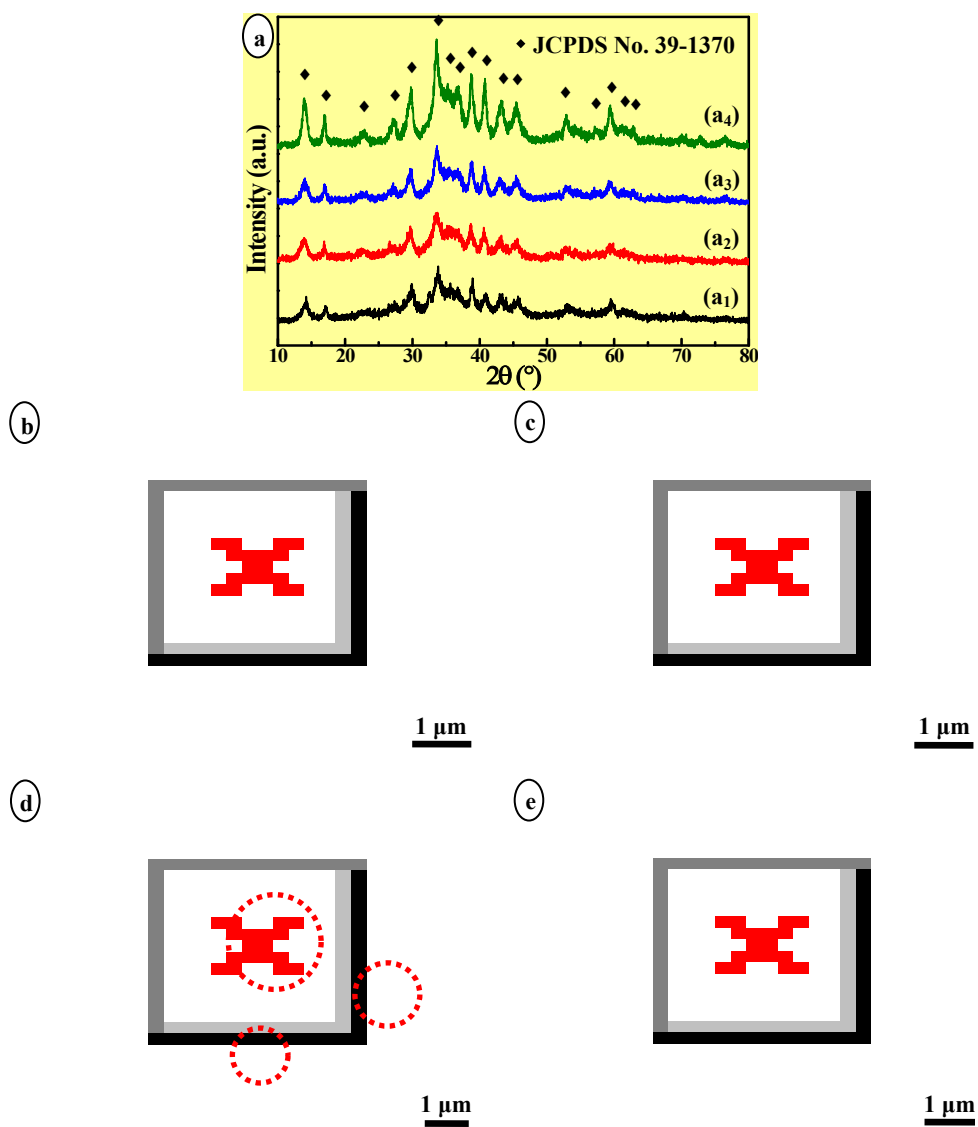

**Fig. S3.** XRD patterns (a) and morphology evolution (b-e) of the ionothermal products obtained at 150 °C at different growth durations. Time (h): (a<sub>1</sub>, b)-6.0, (a<sub>2</sub>, c)-8.0, (a<sub>3</sub>, d)-10.0, (a<sub>4</sub>, e)-16.0.

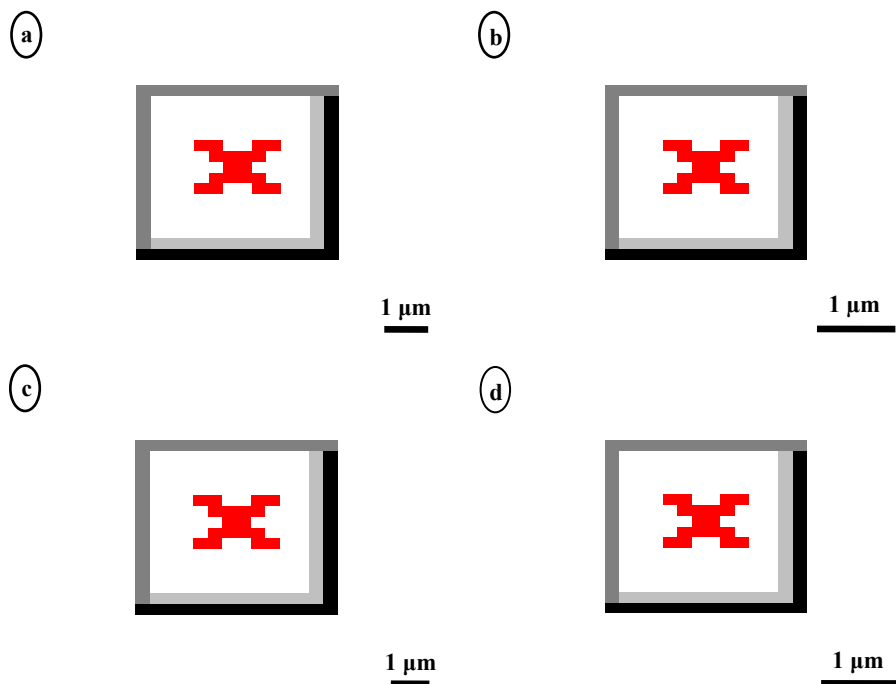

**Fig. S4.** Morphology evolution of the  $\text{MgBO}_2(\text{OH})$  nanostructures obtained at  $150\text{ }^\circ\text{C}$  for 12.0 h by using different volume ratios of ILs / water as media. Volume ratio of ILs / water: (a)-8/1, (b)-3/1, (c)-2/1, (d)-0/1.

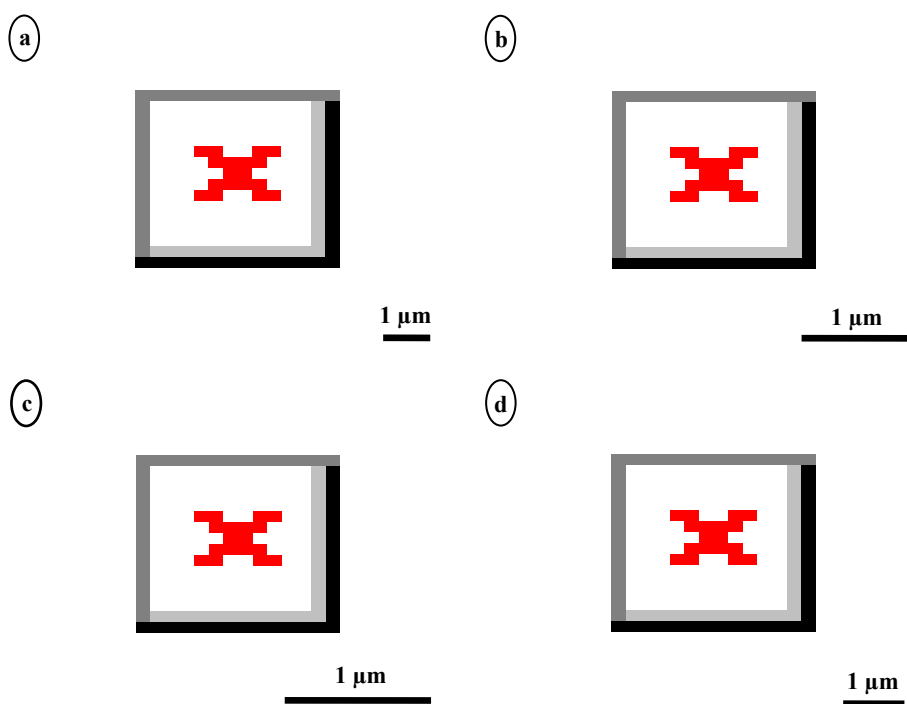

**Fig. S5.**  $\text{MgBO}_2(\text{OH})$  obtained at  $150\text{ }^\circ\text{C}$  for 12.0 h by using (a) DMF, (b) DMA (Dimethylamine), (c) mixture of  $\text{HNO}_3$  and DMF, and (d) liquid recovered from the former ionothermal treatment ( $150\text{ }^\circ\text{C}$ , 12.0 h) as the solvent, respectively.

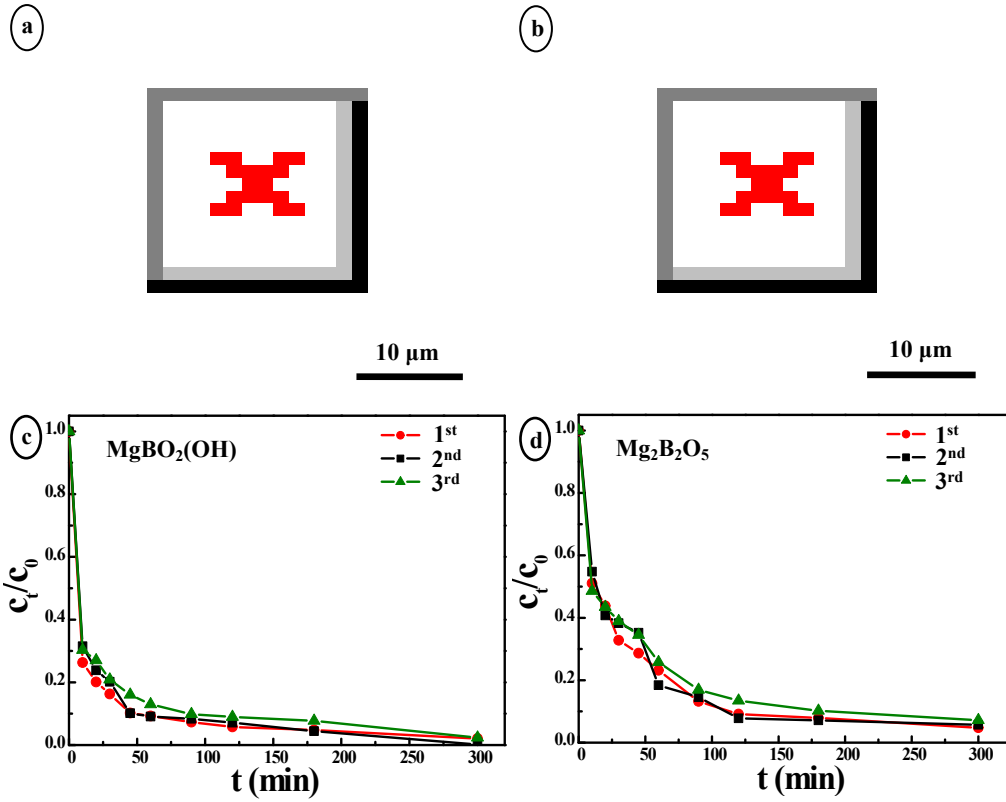

**Fig. S6.** SEM images of the regenerated MgBO<sub>2</sub>(OH) (a) and Mg<sub>2</sub>B<sub>2</sub>O<sub>5</sub> (b) superstructures by calcining the corresponding adsorbents containing previously adsorbed CR at 400 °C for 2.0 h with a heating rate of 2 °C min<sup>-1</sup>, and the adsorption performances of the regenerated MgBO<sub>2</sub>(OH) (c) and Mg<sub>2</sub>B<sub>2</sub>O<sub>5</sub> (d) superstructures when used as the adsorbents for the second (—■—) and third (—▲—) time, with the first (—●—) time for comparison.

**Table S1.** Parameters of the isotherm models for the adsorption of CR onto the MgBO<sub>2</sub>(OH) and Mg<sub>2</sub>B<sub>2</sub>O<sub>5</sub> superstructures at room temperature with an initial concentration of 50 mg L<sup>-1</sup>.

| Samples                                       | Langmuir isotherm model     |                           |        | Freundlich isotherm model |       |        |
|-----------------------------------------------|-----------------------------|---------------------------|--------|---------------------------|-------|--------|
|                                               | $q_m$ (g mg <sup>-1</sup> ) | $b$ (L mg <sup>-1</sup> ) | $R^2$  | $k_f$                     | $1/n$ | $R^2$  |
| MgBO <sub>2</sub> (OH)                        | 228.3                       | 0.64                      | 0.9903 | 98.22                     | 0.17  | 0.8890 |
| Mg <sub>2</sub> B <sub>2</sub> O <sub>5</sub> | 139.3                       | 0.98                      | 0.9903 | 68.96                     | 0.14  | 0.8766 |

**Table S2.** Parameters of the kinetic models for the adsorption of CR onto the MgBO<sub>2</sub>(OH) and Mg<sub>2</sub>B<sub>2</sub>O<sub>5</sub> superstructures at room temperature with an initial concentration of 50 mg L<sup>-1</sup>.

| Samples                                       | $q_{e,exp}$<br>(g mg <sup>-1</sup> ) | pseudo-first-order kinetic model    |                            |        | pseudo-second-order kinetic model   |                                               |        |
|-----------------------------------------------|--------------------------------------|-------------------------------------|----------------------------|--------|-------------------------------------|-----------------------------------------------|--------|
|                                               |                                      | $q_{e,calc1}$ (g mg <sup>-1</sup> ) | $k_1$ (min <sup>-1</sup> ) | $R^2$  | $q_{e,calc2}$ (g mg <sup>-1</sup> ) | $k_2$ (mg g <sup>-1</sup> min <sup>-1</sup> ) | $R^2$  |
| MgBO <sub>2</sub> (OH)                        | 97.94                                | 26.57                               | 0.0096                     | 0.6192 | 99.01                               | 0.0024                                        | 0.9995 |
| Mg <sub>2</sub> B <sub>2</sub> O <sub>5</sub> | 96.59                                | 57.59                               | 0.0130                     | 0.9244 | 97.09                               | 0.0009                                        | 0.9967 |

**Table S3.** Parameters of the intra-particle diffusion model for the adsorption of CR onto the MgBO<sub>2</sub>(OH) and Mg<sub>2</sub>B<sub>2</sub>O<sub>5</sub> superstructures at room temperature with an initial concentration of 50 mg L<sup>-1</sup>.

| Samples                                       | $k_{diff1}$ (mg g <sup>-1</sup> h <sup>-1/2</sup> ) | $k_{diff2}$ (mg g <sup>-1</sup> h <sup>-1/2</sup> ) | $c_1$ (mg g <sup>-1</sup> ) | $c_2$ (mg g <sup>-1</sup> ) |
|-----------------------------------------------|-----------------------------------------------------|-----------------------------------------------------|-----------------------------|-----------------------------|
| MgBO <sub>2</sub> (OH)                        | 34.78                                               | 5.53                                                | 59.54                       | 85.76                       |
| Mg <sub>2</sub> B <sub>2</sub> O <sub>5</sub> | 45.96                                               | 6.89                                                | 30.04                       | 78.64                       |
